# Supplementary material
Source: PubMed Central journal article supplement (PMC4440416)
Supplement: NIHMS626366-supplement-4.pdf [file NIHMS626366-supplement-4.pdf]

| <b>NaOH g/100ml<br/>water</b> | <b>R.H % at 20C</b> |
|-------------------------------|---------------------|
| 0                             | 100                 |
| 5                             | 96.36               |
| 10                            | 79.25               |
| 20                            | 64.43               |
| 30                            | 49.6                |
| 40                            | 35.92               |
